# Supplementary material for: mTOR inhibitor improves autistic-like behaviors related to Tsc2 haploinsufficiency but not following developmental status epilepticus
Source: J Neurodev Disord. 2021 Apr 17;13:14. doi: 10.1186/s11689-021-09357-2 (PMC8052752; doi:10.1186/s11689-021-09357-2)
Supplement: Supplementary file 2 — Additional file 2: Supplementary Table S1. Detailed statistical results from three-way ANOVA and from two-way ANOVA. [file 11689_2021_9357_MOESM2_ESM.xlsx]

## Sheet: IBM SPSS Statistics 25
Figure 1 - Supplemental material
Body weight curve
	Three-way ANOVA RM:
		df	Error df	F	p	Sig.	Partial eta squared
	Genotype	1	66	0.124	0.726		0.002
	DSE_treatment	1	66	0.699	0.406		0.01
	Genotype*DSE_treatment	1	66	0.619	0.434		0.009
	(Greenhouse-Geisser)
	Age	1.261	83.225	4207.38	0	***	0.985
	Age*Genotype	1.261	83.225	0.617	0.47		0.009
	Age*DSE_treatment	1.261	83.225	4.092	0.037	*	0.058
	Age*Genotype*DSE_treatment	1.261	83.225	1.395	0.248		0.021
	Simple effects (Time*Genotype):				p	Sig.
	Genotype in P11				0.659
	Genotype in P12				0.614
	Genotype in P14				0	***
	Genotype in P19				0.001	***
	Genotype in P27				0.015	*
	Genotype in P40				0.01	**
	Genotype in P90				0.335
Social play duration (P19)
	t-test:
		df	t	p	Sig.
	Genotype	15	3.15	0.007	**
Total call count (P19)
	t-test:
		df	t	p	Sig.
	Genotype	3.035	15	0.008	**
Figure 2 - Supplemental material
SOCIAL INTERACTIONS
Anogenital exploration
	Three-way ANOVA RM:
		df	Error df	F	p	Sig.	Partial eta squared
	Genotype	1	32	2.036	0.163		0.06
	DSE_treatment	1	32	23.909	0	***	0.428
	Genotype*DSE_treatment	1	32	0.012	0.913		0
	(Sphericity Assumed)
	Time	2	64	16.078	0	***	0.334
	Time*Genotype	2	64	3.438	0.038	*	0.097
	Time*DSE_treatment	2	64	0.721	0.49		0.022
	Time*Genotype*DSE_treatment	2	64	1.921	0.155		0.057
	Simple effects (Time*Genotype):				p	Sig.
	Genotype in T1				0.036	*
	Genotype in T2				0.597
	Genotype in T3				0.677
Non-anogenital exploration
	Three-way ANOVA RM:
		df	Error df	F	p	Sig.	Partial eta squared
	Genotype	1	32	0.002	0.965		0
	DSE_treatment	1	32	12.285	0.001	***	0.277
	Genotype*DSE_treatment	1	32	1.541	0.223		0.046
	(Greenhouse-Geisser)
	Time	1.577	50.456	1.809	0.181		0.054
	Time*Genotype	1.577	50.456	2.461	0.107		0.071
	Time*DSE_treatment	1.577	50.456	1.031	0.349		0.031
	Time*Genotype*DSE_treatment	1.577	50.456	0.172	0.791		0.005
Figure 3 - Supplemental material
ELEVATED PLUS MAZE
Total arm visits
	Three-way ANOVA RM:
		df	Error df	F	p	Sig.	Partial eta squared
	Genotype	1	32	1.079	0.307		0.033
	DSE_treatment	1	32	1.667	0.206		0.05
	Genotype*DSE_treatment	1	32	0.005	0.945		0
	(Sphericity Assumed)
	Time	3	96	3.839	0.012	*	0.107
	Time*Genotype	3	96	0.273	0.845		0.008
	Time*DSE_treatment	3	96	0.193	0.901		0.006
	Time*Genotype*DSE_treatment	3	96	1.826	0.148		0.054
Open arm visits
	Negative binomial model with log link
		Omnibus test	Sig.
	HAB	0.12
	T1	0.127
	T2	0.026	*
	T3	0.287
									95% Wald Confidence Interval for Exp(B)
		B	Std. Error	Wald Chi-Square	df	Sig.	p	Exp(B)	Lower	Upper
	HAB
	Genotype	-1.783	0.8954	3.967	1	*	0.046	0.168	0.029	0.972
	DSE_treatment	0.116	0.5453	0.045	1		0.832	1.123	0.386	3.27
	Genotype*DSE_treatment	1.542	1.0717	2.071	1		0.15	4.675	0.572	38.196
	T1
	Genotype	-1.515	0.9054	2.8	1		0.094	0.22	0.037	1.296
	DSE_treatment	0.384	0.5617	0.468	1		0.494	1.469	0.488	4.415
	Genotype*DSE_treatment	0.869	1.0992	0.624	1		0.429	2.383	0.276	20.552
	T2
	Genotype	-1.723	1.1696	2.17	1		0.141	0.179	0.018	1.767
	DSE_treatment	0.916	0.6011	2.323	1		0.127	2.5	0.77	8.121
	Genotype*DSE_treatment	0.742	1.3401	0.307	1		0.58	2.1	0.152	29.035
	T3
	Genotype	-0.624	0.8374	0.556	1		0.456	0.536	0.104	2.765
	DSE_treatment	0.31	0.6319	0.241	1		0.624	1.364	0.395	4.705
	Genotype*DSE_treatment	-0.849	1.2249	0.481	1		0.488	0.428	0.039	4.719
Looking down duration
	Three-way ANOVA RM:
		df	Error df	F	p	Sig.	Partial eta squared
	Genotype	1	32	6.205	0.018	*	0.162
	DSE_treatment	1	32	7.78	0.009	**	0.196
	Genotype*DSE_treatment	1	32	0.069	0.794		0.002
	(Greenhouse-Geisser)
	Time	2.168	69.377	3.71	0.026	*	0.104
	Time*Genotype	2.168	69.377	0.17	0.86		0.005
	Time*DSE_treatment	2.168	69.377	0.171	0.86		0.005
	Time*Genotype*DSE_treatment	2.168	69.377	1.479	0.234		0.044
OPEN FIELD TEST
Locomotion
	Three-way ANOVA RM:
		df	Error df	F	p	Sig.	Partial eta squared
	Genotype	1	29	0.015	0.902		0.001
	DSE_treatment	1	29	0.033	0.857		0.001
	Genotype*DSE_treatment	1	29	1.024	0.32		0.034
	(Sphericity Assumed)
	Time	3	87	18.233	0	***	0.386
	Time*Genotype	3	87	0.24	0.868		0.008
	Time*DSE_treatment	3	87	0.199	0.897		0.007
	Time*Genotype*DSE_treatment	3	87	0.399	0.754		0.014
LIGHT-DARK TEST
Light duration
	Three-way ANOVA RM:
		df	Error df	F	p	Sig.	Partial eta squared
	Genotype	1	29	0.516	0.478		0.017
	DSE_treatment	1	29	0.218	0.644		0.007
	Genotype*DSE_treatment	1	29	0.087	0.77		0.003
	(Greenhouse-Geisser)
	Time	1.443	41.857	5.065	0.019	*	0.149
	Time*Genotype	1.443	41.857	0.481	0.56		0.016
	Time*DSE_treatment	1.443	41.857	4.329	0.03	*	0.13
	Time*Genotype*DSE_treatment	1.443	41.857	3.109	0.07		0.097
	Simple effects (Time*DSE_treatment):				p	Sig.
	DSE_treatment in T1				0.674
	DSE_treatment in T2				0.644
	DSE_treatment in T3				0.071
Y-MAZE TEST
Total arm visits
	Three-way ANOVA RM:
		df	Error df	F	p	Sig.	Partial eta squared
	Genotype	1	32	0.501	0.484		0.015
	DSE_treatment	1	32	0.085	0.773		0.003
	Genotype*DSE_treatment	1	32	0.879	0.356		0.027
	(Sphericity Assumed)
	Time	2	64	23.895	0	***	0.427
	Time*Genotype	2	64	1.632	0.204		0.049
	Time*DSE_treatment	2	64	0.383	0.683		0.012
	Time*Genotype*DSE_treatment	2	64	1.231	0.299		0.037
Spontaneous alternation
	Three-way ANOVA RM:
		df	Error df	F	p	Sig.	Partial eta squared
	Genotype	1	32	0.031	0.862		0.001
	DSE_treatment	1	32	4.317	0.046	*	0.119
	Genotype*DSE_treatment	1	32	1.608	0.214		0.048
	(Sphericity Assumed)
	Time	2	64	0.624	0.539		0.019
	Time*Genotype	2	64	1.219	0.302		0.037
	Time*DSE_treatment	2	64	0.012	0.988		0
	Time*Genotype*DSE_treatment	2	64	0.456	0.636		0.014
NOVEL OBJECT RECOGNITION
Discrimination index
	Three-way ANOVA RM:
		df	Error df	F	p	Sig.	Partial eta squared
	Genotype	1	32	0.055	0.816		0.002
	DSE_treatment	1	32	1.907	0.177		0.056
	Genotype*DSE_treatment	1	32	0.019	0.892		0.001
	(Sphericity Assumed)
	Time	2	64	1.63	0.204		0.048
	Time*Genotype	2	64	0.369	0.693		0.011
	Time*DSE_treatment	2	64	0.083	0.92		0.003
	Time*Genotype*DSE_treatment	2	64	0.208	0.813		0.006
Figure 4 - Supplemental material
EEG
Wet dog shakes (WDS): session averages (T1-T3)
	Three-way ANOVA RM:
		df	Error df	F	p	Sig.	Partial eta squared
	Genotype	1	11	6.85	0.024	*	0.384
	DSE_treatment	1	11	1.038	0.33		0.086
	Genotype*DSE_treatment	1	11	1.676	0.222		0.132
	(Sphericity Assumed)
	Time	3	33	9.38	0	***	0.46
	Time*Genotype	3	33	3.586	0.024	*	0.246
	Time*DSE_treatment	3	33	0.263	0.852		0.023
	Time*Genotype*DSE_treatment	3	33	0.209	0.209		0.127
	Simple effects (Time*Genotype):				p	Sig.
	Genotype in Session 1 (T1)				0.112
	Genotype in Session 2 (T2)				0.001	***
	Genotype in Session 3				0.019	*
	Genotype in Session 4 (T3)				0.515
Wet dog shakes (WDS): session averages (Average Sessions1-4)
	Two-way ANOVA:
		df	Error df	F	p	Sig.	Partial eta squared
	Genotype	1	14	9.062	0.009	**	0.393
	DSE_treatment	1	14	2.419	0.142		0.147
	Genotype*DSE_treatment	1	14	2.538	0.133		0.153
Wet dog shakes (WDS): changes in occurrence within session
	Three-way ANOVA RM:
		df	Error df	F	p	Sig.	Partial eta squared
	Genotype	1	14	13.007	0.003	**	0.482
	DSE_treatment	1	14	1.491	0.242		0.096
	Genotype*DSE_treatment	1	14	2.421	0.142		0.147
	(Sphericity Assumed)
	Time	7	98	19.223	0	***	0.579
	Time*Genotype	7	98	2.202	0.04	*	0.136
	Time*DSE_treatment	7	98	1.084	0.379		0.072
	Time*Genotype*DSE_treatment	7	98	2.024	0.06		0.126
	Simple effects (Time*Genotype):				p	Sig.
	Genotype in 0-5 min				0.005	**
	Genotype in 5-10 min				0.013	*
	Genotype in 10-15 min				0.142
	Genotype in 15-20 min				0.009	**
	Genotype in 20-25 min				0.085
	Genotype in 25-30 min				0.139
	Genotype in 30-35 min				0.272
	Genotype in 35-40 min				0.477
Figure S2 - Supplemental material
Neonatal ultrasonic vocalization (P7)
Total call number
Stepped call number
Median bout duration
	MANOVA (all 3 parameters together):
		Hypothesis df	Error df	F	p	Sig.	Partial eta squared
	Genotype	3	49	2.744	0.053		0.144
		df	Error df	F	p	Sig.	Partial eta squared
	Genotype: pups_call_count	1	51	1.184	0.282		0.023
	Genotype: pups_vs_number_log	1	51	5.272	0.026	*	0.094
	Genotype: pups_median_bout_log	1	51	6.211	0.016	*	0.109

## Sheet: GraphPad PRISM 5
Figure 2 - Supplemental material
SOCIAL INTERACTIONS
Anogenital exploration
										Bonferroni's Multiple Comparison Test
		Two-way ANOVA:
			df	Error df	F	p	Sig.						T1			T2			T3
	T1	Genotype	1	40	10.8	0.0021	**						t	Sig.	95% CI of diff	t	Sig.	95% CI of diff	t	Sig.	95% CI of diff
		DSE_treatment	1	40	20.01	< 0.0001	***			wt naïve	vs	Tsc2+/- naïve	3.325	*	-21,73 to -1,957	0.04311		-10,01 to 9,703	0.1451		-10,75 to 9,678
		Genotype*DSE_treatment	1	40	2.005	0.1645				wt naïve	vs	wt DSE	4.164	***	-24,72 to -4,945	3.551	**	-22,46 to -2,752	3.62	**	-23,53 to -3,104
	T2	Genotype	1	40	0.5465	0.4641				wt naïve	vs	Tsc2+/- DSE	5.487	***	-29,43 to -9,657	4.553	***	-26,02 to -6,311	4.287	***	-25,98 to -5,560
		DSE_treatment	1	40	32.49	< 0.0001	***			Tsc2+/- naïve	vs	wt DSE	0.839		-12,88 to 6,900	3.508	**	-22,31 to -2,598	3.475	**	-22,99 to -2,570
		Genotype*DSE_treatment	1	40	0.4601	0.5015				Tsc2+/- naïve	vs	Tsc2+/- DSE	2.162		-17,59 to 2,188	4.51	***	-25,87 to -6,158	4.142	**	-25,45 to -5,026
	T3	Genotype	1	40	0.3302	0.5688				wt DSE	vs	Tsc2+/- DSE	1.323		-14,60 to 5,176	1.002		-13,42 to 6,297	0.6675		-12,67 to 7,756
		DSE_treatment	1	40	30.12	< 0.0001	***
		Genotype*DSE_treatment	1	40	0.1364	0.7138
Non-anogenital exploration
										Bonferroni's Multiple Comparison Test
		Two-way ANOVA:
			df	Error df	F	p	Sig.						T1			T2			T3
	T1	Genotype	1	40	4.034	0.0514							t	Sig.	95% CI of diff	t	Sig.	95% CI of diff	t	Sig.	95% CI of diff
		DSE_treatment	1	40	21.46	< 0.0001	***			wt naïve	vs	Tsc2+/- naïve	0.4323		-18,42 to 13,46	1.11		-10,73 to 25,04	1.622		-6,792 to 25,90
		Genotype*DSE_treatment	1	40	1.952	0.17				wt naïve	vs	wt DSE	2.287		-29,08 to 2,805	1.12		-25,10 to 10,67	1.11		-22,88 to 9,811
	T2	Genotype	1	40	0.9021	0.3479				wt naïve	vs	Tsc2+/- DSE	4.696	***	-42,91 to -11,03	0.8867		-23,60 to 12,17	1.609		-25,82 to 6,868
		DSE_treatment	1	40	4.857	0.0334	*			Tsc2+/- naïve	vs	wt DSE	1.855		-26,60 to 5,287	2.23		-32,26 to 3,518	2.732		-32,43 to 0,2575
		Genotype*DSE_treatment	1	40	0.3846	0.5387				Tsc2+/- naïve	vs	Tsc2+/- DSE	4.264	***	-40,43 to -8,544	1.997		-30,76 to 5,020	3.232	*	-35,38 to -2,685
	T3	Genotype	1	40	0.6302	0.432				wt DSE	vs	Tsc2+/- DSE	2.408		-29,77 to 2,111	0.2331		-16,39 to 19,39	0.4997		-19,29 to 13,40
		DSE_treatment	1	40	9.425	0.0038	**
		Genotype*DSE_treatment	1	40	2.252	0.1413
Figure 3 - Supplemental material
ELEVATED PLUS MAZE
Total arm visits
		Two-way ANOVA:
			df	Error df	F	p	Sig.
	HAB	Genotype	1	40	0.8874	0.3518
		DSE_treatment	1	40	1.236	0.2729
		Genotype*DSE_treatment	1	40	0.085	0.7721
	T1	Genotype	1	40	2.587	0.1156
		DSE_treatment	1	40	3.307	0.0765
		Genotype*DSE_treatment	1	40	2.128	0.1525
	T2	Genotype	1	40	1.391	0.2451
		DSE_treatment	1	40	2.08	0.157
		Genotype*DSE_treatment	1	40	0.6339	0.4306
	T3	Genotype	1	40	0.2314	0.6331
		DSE_treatment	1	40	0.7908	0.3792
		Genotype*DSE_treatment	1	40	1.85	0.1814
Open arm visits
Data didn't exhibit normal distribution and could not be normalized by transformation
		Two-way ANOVA:
			df	Error df	F	p	Sig.
	HAB	Genotype	1	40	2.532	0.1194
		DSE_treatment	1	40	1.543	0.2214
		Genotype*DSE_treatment	1	40	0.7695	0.3856
	T1	Genotype	1	40	4.819	0.034	*
		DSE_treatment	1	40	2.282	0.1388
		Genotype*DSE_treatment	1	40	0.01442	0.905
	T2	Genotype	1	40	3.639	0.0637
		DSE_treatment	1	40	3.267	0.0782
		Genotype*DSE_treatment	1	40	0.3516	0.5565
	T3	Genotype	1	40	2.901	0.0963
		DSE_treatment	1	40	0.02491	0.8754
		Genotype*DSE_treatment	1	40	0.4351	0.5133
Looking down duration
										Bonferroni's Multiple Comparison Test
		Two-way ANOVA:
			df	Error df	F	p	Sig.						HAB			T1			T2			T3
	HAB	Genotype	1	40	5.475	0.0244	*						t	Sig.	95% CI of diff	t	Sig.	95% CI of diff	t	Sig.	95% CI of diff	t	Sig.	95% CI of diff
		DSE_treatment	1	40	4.254	0.0457	*			wt naïve	vs	Tsc2+/- naïve	1.829		-34,71 to 7,139	1.488		-28,52 to 8,615	1.687		-28,96 to 7,068	0.06467		-13,62 to 13,00
		Genotype*DSE_treatment	1	40	0.06081	0.8065				wt naïve	vs	wt DSE	1.284		-11,25 to 30,61	1.816		-6,421 to 30,72	1.039		-11,27 to 24,76	4.039	**	6,060 to 32,69
	T1	Genotype	1	40	3.113	0.0853				wt naïve	vs	Tsc2+/- DSE	0.1961		-22,40 to 19,45	0.8085		-13,16 to 23,98	0.1933		-16,76 to 19,27	0.1044		-13,81 to 12,81
		DSE_treatment	1	40	8.456	0.0059	**			Tsc2+/- naïve	vs	wt DSE	3.113	*	2,541 to 44,39	3.304	*	3,532 to 40,67	2.726		-0,3265 to 35,70	4.104	**	6,370 to 33,00
		Genotype*DSE_treatment	1	40	0.1154	0.7359				Tsc2+/- naïve	vs	Tsc2+/- DSE	1.633		-8,617 to 33,24	2.296		-3,207 to 33,93	1.88		-5,813 to 30,22	0.03974		-13,50 to 13,12
	T2	Genotype	1	40	3.206	0.0809				wt DSE	vs	Tsc2+/- DSE	1.48		-32,08 to 9,768	1.007		-25,31 to 11,83	0.8454		-23,50 to 12,53	4.144	**	-33,19 to -6,561
		DSE_treatment	1	40	4.26	0.0456	*
		Genotype*DSE_treatment	1	40	0.3539	0.5552
	T3	Genotype	1	40	8.856	0.0049	**
		DSE_treatment	1	40	7.999	0.0073	**
		Genotype*DSE_treatment	1	40	8.32	0.0063	**
OPEN FIELD TEST
Locomotion
										Bonferroni's Multiple Comparison Test
		Two-way ANOVA:
			df	Error df	F	p	Sig.						T3
	HAB	Genotype	1	40	0.8219	0.3701							t	Sig.	95% CI of diff
		DSE_treatment	1	40	0.03848	0.8455				wt naïve	vs	Tsc2+/- naïve	1.913		-188,7 to 1026
		Genotype*DSE_treatment	1	40	0.08375	0.7738				wt naïve	vs	wt DSE	1.609		-255,3 to 959,6
	T1	Genotype	1	40	0.02279	0.8808				wt naïve	vs	Tsc2+/- DSE	0.01478		-604,2 to 610,7
		DSE_treatment	1	40	0.02577	0.8733				Tsc2+/- naïve	vs	wt DSE	0.3042		-674,0 to 540,9
		Genotype*DSE_treatment	1	40	0.1333	0.7169				Tsc2+/- naïve	vs	Tsc2+/- DSE	1.899		-1023 to 192,0
	T2	Genotype	1	40	0.07609	0.7841				wt DSE	vs	Tsc2+/- DSE	1.594		-956,3 to 258,5
		DSE_treatment	1	40	0.5367	0.4681
		Genotype*DSE_treatment	1	40	0.895	0.3498
	T3	Genotype	1	40	0.05087	0.8227
		DSE_treatment	1	40	0.04188	0.8389
		Genotype*DSE_treatment	1	40	6.152	0.0174	*
LIGHT-DARK TEST
Light duration
Data were normalized by log transformation
										Bonferroni's Multiple Comparison Test
		Two-way ANOVA:
			df	Error df	F	p	Sig.						T3
	T1	Genotype	1	40	0.003346	0.9542							t	Sig.	95% CI of diff
		DSE_treatment	1	40	1.396	0.2444				wt naïve	vs	Tsc2+/- naïve	0.534		-0,1724 to 0,2546
		Genotype*DSE_treatment	1	40	1.776	0.1901				wt naïve	vs	wt DSE	0.724		-0,2692 to 0,1578
	T2	Genotype	1	40	0.8903	0.3511				wt naïve	vs	Tsc2+/- DSE	3.657	**	-0,4947 to -0,06775
		DSE_treatment	1	40	0.05622	0.8138				Tsc2+/- naïve	vs	wt DSE	1.258		-0,3102 to 0,1167
		Genotype*DSE_treatment	1	40	2.394	0.1297				Tsc2+/- naïve	vs	Tsc2+/- DSE	4.191	***	-0,5358 to -0,1088
	T3	Genotype	1	40	2.877	0.0976				wt DSE	vs	Tsc2+/- DSE	2.933	*	-0,4391 to -0,01207
		DSE_treatment	1	40	12.08	0.0012	**
		Genotype*DSE_treatment	1	40	6.009	0.0187	*
Y-MAZE TEST
Total arm visits
										Bonferroni's Multiple Comparison Test
		Two-way ANOVA:
			df	Error df	F	p	Sig.						T1
	T1	Genotype	1	40	0.02622	0.8722							t	Sig.	95% CI of diff
		DSE_treatment	1	40	0.1936	0.6623				wt naïve	vs	Tsc2+/- naïve	1.32		-2,221 to 6,249
		Genotype*DSE_treatment	1	40	4.117	0.0491	*			wt naïve	vs	wt DSE	1.746		-1,571 to 6,899
	T2	Genotype	1	40	0.1607	0.6907				wt naïve	vs	Tsc2+/- DSE	0.1966		-3,935 to 4,535
		DSE_treatment	1	40	0.9103	0.3458				Tsc2+/- naïve	vs	wt DSE	0.4256		-3,586 to 4,884
		Genotype*DSE_treatment	1	40	1.122	0.2957				Tsc2+/- naïve	vs	Tsc2+/- DSE	1.124		-5,949 to 2,521
	T3	Genotype	1	40	3.626	0.0641				wt DSE	vs	Tsc2+/- DSE	1.549		-6,599 to 1,871
		DSE_treatment	1	40	0.1357	0.7145
		Genotype*DSE_treatment	1	40	0.07174	0.7902
Spontaneous alternation
		Two-way ANOVA:
			df	Error df	F	p	Sig.
	T1	Genotype	1	40	1.169	0.286
		DSE_treatment	1	40	2.897	0.0965
		Genotype*DSE_treatment	1	40	0.03912	0.8442
	T2	Genotype	1	40	0.07626	0.7839
		DSE_treatment	1	40	2.068	0.1582
		Genotype*DSE_treatment	1	40	2.9	0.0964
	T3	Genotype	1	40	2.471	0.1238
		DSE_treatment	1	40	2.764	0.1042
		Genotype*DSE_treatment	1	40	0.7664	0.3866
NOVEL OBJECT RECOGNITION
Discrimination index
		Two-way ANOVA:
			df	Error df	F	p	Sig.
	T1	Genotype	1	40	0.17	0.6824
		DSE_treatment	1	40	0.7356	0.3962
		Genotype*DSE_treatment	1	40	0.4514	0.5055
	T2	Genotype	1	40	0.8027	0.3756
		DSE_treatment	1	40	1.328	0.256
		Genotype*DSE_treatment	1	40	0.04332	0.8362
	T3	Genotype	1	40	0.005061	0.9436
		DSE_treatment	1	40	1.779	0.1898
		Genotype*DSE_treatment	1	40	0.2177	0.6433
Figure 4 - Supplemental material
EEG
Wet dog shakes (WDS): session averages (T1-T3)
										Bonferroni's Multiple Comparison Test
		Two-way ANOVA:
			df	Error df	F	p	Sig.						Session 1 (T1)			Session 2 (T2)			Session 3
	Session 1 (T1)	Genotype	1	20	20.29	0.0002	***						t	Sig.	95% CI of diff	t	Sig.	95% CI of diff	t	Sig.	95% CI of diff
		DSE_treatment	1	20	0.9281	0.3469				wt naïve	vs	Tsc2+/- naïve	5.885	***	14,73 to 43,87	5.157	***	7,092 to 25,71	2.599		-1,585 to 26,65
		Genotype*DSE_treatment	1	20	14.58	0.0011	**			wt naïve	vs	wt DSE	2.019		-4,524 to 24,62	3.192	*	0,8415 to 19,46	2.633		-1,418 to 26,82
	Session 2 (T2)	Genotype	1	20	27.27	< 0.0001	***			wt naïve	vs	Tsc2+/- DSE	2.504		-2,107 to 27,04	5.419	***	7,925 to 26,54	3.635	**	3,415 to 31,65
		DSE_treatment	1	20	5.964	0.024	*			Tsc2+/- naïve	vs	wt DSE	3.866	**	-33,82 to -4,676	1.965		-15,56 to 3,058	0.03456		-13,95 to 14,28
		Genotype*DSE_treatment	1	20	4.291	0.0515				Tsc2+/- naïve	vs	Tsc2+/- DSE	3.381	*	-31,41 to -2,260	0.262		-8,475 to 10,14	1.037		-9,118 to 19,12
	Session 3	Genotype	1	20	6.482	0.0192	*			wt DSE	vs	Tsc2+/- DSE	0.4854		-12,16 to 16,99	2.227		-2,225 to 16,39	1.002		-9,285 to 18,95
		DSE_treatment	1	20	6.734	0.0173	*
		Genotype*DSE_treatment	1	20	1.274	0.2723
	Session 4 (T3)	Genotype	1	20	1.511	0.2333
		DSE_treatment	1	20	1.902	0.1831
		Genotype*DSE_treatment	1	20	0.1761	0.6792
Wet dog shakes (WDS): session averages (Average Sessions1-4)
										Bonferroni's Multiple Comparison Test
		Two-way ANOVA:
			df	Error df	F	p	Sig.						Average Sessions 1-4
	Average Sessions 1-4	Genotype	1	20	18.45	0.0004	***						t	Sig.	95% CI of diff
		DSE_treatment	1	20	4.924	0.0382	*			wt naïve	vs	Tsc2+/- naïve	4.644	***	4,988 to 21,99
		Genotype*DSE_treatment	1	20	5.167	0.0342	*			wt naïve	vs	wt DSE	3.176	*	0,7237 to 17,73
										wt naïve	vs	Tsc2+/- DSE	4.606	**	4,877 to 21,88
										Tsc2+/- naïve	vs	wt DSE	1.468		-12,77 to 4,237
Wet dog shakes (WDS): changes within session										Tsc2+/- naïve	vs	Tsc2+/- DSE	0.0383		-8,612 to 8,390
										wt DSE	vs	Tsc2+/- DSE	1.43		-4,348 to 12,65
		Two-way ANOVA:
			df	Error df	F	p	Sig.
	0-5 min	Genotype	1	20	29.93	< 0.0001	***
		DSE_treatment	1	20	5.146	0.0345	*
		Genotype*DSE_treatment	1	20	15.44	0.0008	***
	5-10 min	Genotype	1	20	13.18	0.0017	**
		DSE_treatment	1	20	0.8439	0.3692
		Genotype*DSE_treatment	1	20	0.8969	0.3549
	10-15 min	Genotype	1	20	2.653	0.119
		DSE_treatment	1	20	4.603	0.0444	*
		Genotype*DSE_treatment	1	20	0.2042	0.6562
	15-20 min	Genotype	1	20	13.69	0.0014	**
		DSE_treatment	1	20	1.81	0.1935
		Genotype*DSE_treatment	1	20	0.004563	0.9468
	20-25 min	Genotype	1	20	5.192	0.0338	*
		DSE_treatment	1	20	0.0857	0.7727
		Genotype*DSE_treatment	1	20	0.0709	0.7928
	25-30 min	Genotype	1	20	10.72	0.0038	**
		DSE_treatment	1	20	1.521	0.2317
		Genotype*DSE_treatment	1	20	16.35	0.0006	***
	30-35 min	Genotype	1	20	3.162	0.0906
		DSE_treatment	1	20	0.2659	0.6117
		Genotype*DSE_treatment	1	20	1.706	0.2063
	35-40 min	Genotype	1	20	0.3916	0.5385
		DSE_treatment	1	20	7.232	0.0141	*
		Genotype*DSE_treatment	1	20	1.609	0.2192
